# Supplementary material
Source: PubMed Central journal article supplement (PMC10621323)
Supplement: NIHMS1935642-supplement-Supplementary_Table_1.pdf [file NIHMS1935642-supplement-Supplementary_Table_1.pdf]

|             |           |        |           |           |            |             |
|-------------|-----------|--------|-----------|-----------|------------|-------------|
| Fouq4       | Sop41     | C84    | Gp1       | Tgpi      | Mgppg      | Chng5       |
| Fuc1a1      | Egof2     | H02    | Egof2     | Gm323     | Agp1a      | Abp19       |
| Sid4d       | 603404810 | Ca11   | Tamm30b   | Fbow0     | Sid4j      | Sap         |
| Sid4i       | Sid4i     | sum    | Uc1       | rcw5      | Spa2       | hdc5        |
| Boc         | Sid4s4    | Zf3b   | Fg4b      | Sng       | Pp3b7b     | Lumr2b      |
| Ctcap15     | Tf1f11    | G1a    | Vf1f11    | Vf1f11    | Sof        | Zf16b5      |
| Nr41        | Ap4j      | Cy3    | Pp1a      | Pp1a      | Hoc8       | Pp1         |
| Pf1a        | Zf3b2     | C4b    | Mg6       | Mxoc      | Lg1        | Gm1130      |
| Ngf15       | Pncd      | Sanc2  | Pncd      | Cs2       | mi-Anc2    | C7          |
| Mm2         | Spy1      | Hg12   | Fhd3      | Gm1286    | 491840509  | Mw-nc1      |
| Dz4         | Hg2       | Nm10b  | Ru25      | Mm2       | Km3        |             |
| Hw4         | Km1a      | Sid4b  | M2        | Dac1      | Pp118a     | Cd2         |
| Md          | Md3b      | Hs1    | Acem      | Qp1       | Qd4        |             |
| Zf1515      | Zf1515b   | Agp    | Fow6      | Lb3       | Cd32       | Qd2b        |
| Zf1516      | Hg2       | Mv1    | Mv1       | Alx12     | Nu112      | Ap9         |
| Dnk         | Mv1       | Lm2    | Mv1       | Cf1       | Cf1        | Mh4b        |
| Cd4         | Ad1       | Lm2    | Ad1       | Mv1       | Amu3       | Gm141       |
| Tgpf        | Vg13c     | Md2j   | Cm1       | Stm       | Gp1        | Pp3b7a      |
| Pu1         | Tgpf      | H02    | Lm2c      | Pw11a     | 1100001020 | Gm1000      |
| Sid4c1      | Sid4c1    | Zf1a2  | Gat4      | Pc3       | Pp3b7b     | Bar1        |
| Mh1c1       | Jm1       | Cnd    | Fm7f      | Kc3       | Tp2a2      | Pw12        |
| Ts1a1       | Fg12      | Hf122  | Ts2a      | Pp3b7c    | Zf1515b    | Gm455       |
| Sng1        | Acub      | 3b3p1  | Sid4a1    | Mg172     | Uc11       | Hg12-p8     |
| Dm1         | Dm1       | Hm1a2  | C1        | Ig1a      | Hd7        | Pmp         |
| Mm1d1       | Ug12      | Simc1  | Tuc5      | Wd86      | Ft1        | Gm1340      |
| Mh2b2       | Pw1       | Hm1a   | Fg18      | Fg18      | Ch         | Pp3b7b      |
| Ab3b        | P2r6      | Hk2a   | Pn        | Gm1r      | MZ1        | Sid4i4      |
| Pk1a2b      | Cm11      | Hk2a   | Ana3      | Fam4b     | Rad        | Pg          |
| Ts1a7       | Tp1a      | Tp1a   | Pw12      | Fg1       | Fg1        | Hm1a11      |
| Lf4         | Ts1a2b    | Hf1a7  | Agp1a     | Mg1a2     | Pw1        | Pp2         |
| Eg1         | Mg1a      | G1a2   | Dm1a1     | Dm1a1     | Gm107a     | Cp1b        |
| Sm1r        | Nk1a2     | Cd1567 | Fm121b    | Pw1       | Rp1        | Fum1a       |
| Am1         | Ng1       | H02    | Ts1       | Thd4      | Rp1        | Gm1         |
| Th3         | Rf14a     | Hk4    | Ap1       | F32011021 | Gm11356    | Nu1         |
| Sid4d1      | Cd49      | Gm10   | Fm110b    | Cd41      | Ap1a2      | Mh2b        |
| Cd4d        | IR1       | Nc17   | Mf22      | Car       | Sh4        | Rp2         |
| Cm1         | Dm6       | Hd2    | Fd5       | Ana4      | Pm44       | Cg1         |
| Eg1d12      | Gp3       | Sd7a5  | Ba1p11    | Gm44      | Fg118      | Gm1340b     |
| Hm1p        | Hg1a5     | Tp1a12 | Gm1285    | Lm1a      | Rf144b     | Gm4512      |
| Hm1c        | Ba2       | Amg110 | H204      | Mg1a      | P32        | Lm1a5       |
|             | Ts1       | Tp1a1  | Sid4      | Hk4       | Cd1a5      | Gm1a2       |
|             | Cd1a5     | Hf4    | Ag11a     | Fm2       | Mv1        | Mh2         |
|             | Sf1       | Hf     | Ts1a2     | Fm2       | Eg1a       | Cd1a2       |
|             | Sf1a13    | Zm12   | Pk1c      | Sd8a2     | Bc1        | Ac1f        |
| Nk1c        | Ld1b1     | Pp1    | Mp1       | Hm1a      | Mg1a1a     | Pw11a       |
| Ts1         | Ts1       | Pp1    | Vn        | I18       | Tm1g1      | Fd1a2-pa2   |
| Nk12        | Cm1a1     | Pp1    | F13       | Cm1a2     | Cm1a2      | Mh2b2       |
| Pk1a1       | Fam4b     | Td1a   | Fam4b     | Hg1a      | Zm1g1      | Hm1a2b      |
| Pk1a2       | Gv4       | Hf4    | Fp        | Rf144b    | Fm167a     | Cf1b1       |
| M1          | Dm1p      | Hf4    | Dm1       | Ag1       | Am1        | Gm112       |
| Hm1b        | Mh1p      | Hf4    | Rp1a      | Sf1a1a6   | Sf1a1a6    | Am1a11      |
| M1          | Ab1a      | Hf4    | Vm1b2b    | Adm1      | Lg1        | Cd1         |
| Pk1a1       | Zf1515    | Hf4    | Cm12      | Cd1a1     | Cd1a3      | Mh2a2       |
| Mp1         | Hf4       | Hf4    | Th1a      | Hg1b      | Bar1       | 1100100020a |
| Gp1a1       | Ag1       | Hf4    | Ac1       | Pe1p      | Sc1b3      | Gm1204      |
| Gp1a2       | Ag1       | Hf4    | Ac1       | Rp1       | Kc3        | Gm138b      |
| Cf1         | Cd1       | Hf4    | Km3       | Km1a      | Tm1a2b     | Gm1a6       |
| M1c         | M1c1a     | Hf4    | Gm1a2     | Tm1a      | Zf1a12     | Cm1         |
| Sf1         | M1        | Hf4    | Sm1a3a    | Nm1       | Eg1        | Pg1         |
| Zf1a12      | Hf4       | Hf4    | Th1       | Ac1       | Cy1        | Gm1131      |
| Hf4         | Hf4       | Hf4    | Tp1a2     | Hf1b      | Sc1        | Gm1073      |
| A21000201a1 | Hf4       | Hf4    | Pk1a      | Hf4       | Adm1       | Sid4i       |
| Spk2        | Zw1m6     | Hf4    | C1a2      | Tm1g1     | Car        | Cw1a        |
| Tm1         | Dm1       | Hf4    | Hm1a      | Tp1a2     | Wm1b2      | 110010110a  |
| Am1a5       | Ab1c10    | Hf4    | Ag1       | Ag1       | Ag1        | Hf4         |
| Nk1c2       | Nk1c      | Hf4    | Hm1b      | Nk1c      | Mh1        | Tm1a205     |
| Uc1a2b1     | Gm1a6     | Hf4    | Ca1a1     | Ca1a1     | Am1a       | Mh1a        |
| Tm1a2       | F1a       | Hf4    | Am1p      | Lm1a1     | Am1        | Am1a        |
| Dm1c1       | F1a       | Hf4    | Z10100141 | Eg1a4     | Sid4i1     | Am1a2       |
| F1a13       | Am1a1a    | Hf4    | Zf1515b   | Mg1a1b7   | Tp1a2      | Mh1a4       |
| Am1a2       | Hf4       | Hf4    | Rh1b      | Gm1a2b2   | Mh1a1c     | Gm1a200     |
| Ch          | M1        | Hf4    | Gm1a4     | Cd1a1     | Tp1a2      | Gm1206      |
| Rm1122a     | Hm1a      | Hf4    | Gm1122a   | Hm1a      | Lm1        | Mh2         |
| Gf1a        | Hf4       | Hf4    | Gf1a      | Vn        | Am1p18     | Sid4i1a1    |
| Cy1a        | Cf1       | Hf4    | Pk1a6     | Sf1a12b   | Lm1a2      | F1b1        |
| Nk1         | Nk1       | Hf4    | Pk1a2     | Cf1171a1  | Am1a2      | Cd1         |
| Jm1a2       | Mh1c1     | Hf4    | Tf1a9     | Tf1       | Tp1a       | Gm1a1964    |
| Ts1a2       | Cd1a5     | Hf4    | Pk1c      | Hg1a5     | Pk1c       | Gm1a1964    |
| Rm1a2       | Mh1a1     | Hf4    | Pk1a      | Rp1a1     | Gf1a4      | Mh1a2       |
| Dm1b2       | Hf4       | Hf4    | Am1c2     | Am1c2     | Am1c2      | 1100100020a |
| 10-5op      | Nm1       | Hf4    | Nm1       | Pc1a6     | Mg1a13     | Rp1c        |
| Ca1a2       | Am1a2b    | Hf4    | Am1a2b    | Hf1a2     | Ag1a5      | Hf1a2       |
| Lm1a2       | Lm1a2     | Hf4    | Am1a2b    | Am1a2b    | Tm1a2b     | Gm1a2       |
| Tm1a1       | Ag1a2     | Hf4    | Gp1       | Faw       | Hf1b1      | Sy1a        |
| Am1a2       | Td1a2a    | Hf4    | Tm1a2     | Sd1a4     | Sd1a4      | Wd1a9       |
| Cd1a1c1     | Hf1c1     | Hf4    | Sg1       | Hf1c1     | Eg1        | 1100100020a |
| Sg1a1       | Td1a2     | Hf4    | Eg1a13    | Tf1a911b  | Ch1a9      | Ch1a7       |
| Ts1a2b      | Pp1a      | Hf4    | Am1       | Fam110    | Cm1        | Gd1181      |
| Am1a2       | Cf1       | Hf4    | Cf17      | Rh1a2     | Mh1        | Pk1a6       |
| Vm1a1       | Gf1a1     | Hf4    | Eg1       | Hm1       | Ag1a5      | Gm1a21      |
| Cd1a1a      | Am1a7a    | Hf4    | Su1       | Ch1a10    | Cd1a3      | mi-Cd1      |
| Cd1a1b      | Hf1       | Hf4    | Su1       | Lm1       | Ph1a1      | Lm1         |
| Td1a2b      | Hf1       | Hf4    | Op1c      | Lm1       | Ph1a1      | Lm1         |
| Cy1a1       | Hf1       | Hf4    | Sg1       | Hm1a1     | Vn         | Mg1a2       |
| Fd1a3a      | Zf1a27    | Hf4    | Am1c2     | Hf1       | Hf1        | Pk1a        |
| Cd1a1       | Tm1a1     | Hf4    | Am1c2     | Ch        | Fam1b      | Rp1a2       |
| Tf1a2       | Cd1a2     | Hf4    | Rh1c1     | Cm1       | Sc1a13     | Gm1756      |
| Am1a2       | Nk1       | Hf4    | Am1a2     | Cf1       | Fg116      | Uc1a5       |
| Lm1b1       | Hm1c1     | Hf4    | Mh1a1     | Mh1c1     | Nm1        | Cd1a1       |
| Tog1a1      | Hf4       | Hf4    | Gf15      | Pd1a16    | Sid4       | Mh1a1       |
| Am1a13b     | Am1a13b   | Hf4    | Eg1       | Eg1a14a   | Tm1a4      | Eg1f        |
| F1a2a       | F1a2a     | Hf4    | Gm1a211   | Eg1       | Sd1a7      | Sm1a1       |
| Am1a2       | Am1a2     | Hf4    | B1a1      | F1a1      | Sp1a4      | Hm1a2       |
| Ts1a2       | Hf4       | Hf4    | Zm1p1     | Lm1       | Km1a5      | Rp1a1       |
| Hm1a2       | Hf4       | Hf4    | Hm1a2     | Am1a2     | Tm1a       | F1a2        |
| Cd1a1       | Hf4       | Hf4    | Rm1c1     | Ch1a1     | Vm1        | Pk13        |
| Ts1a1a      | Hf4       | Hf4    | Gm1209    | Pk1a17    | Lm1a2      | Gm11518     |
| Cd1a1       | Hf4       | Hf4    | Lm1       | Km1a9     | Pp1a1b     | Mh1a1       |
| Ts1a1b      | Hf4       | Hf4    | E1301121  | Am1a6     | Vm1b2b     | Gm1a1       |
| Am1         | Hf4       | Hf4    | Sf1a1a6   | Kf1b3     | Pk1        | Hf1a2       |
| Nk1         | Hf4       | Hf4    | Nk1       | Mh1a21a   | Am1a2      | Mh1a2       |
| Nk1a1       | Hf4       | Hf4    | Sf1a1a6   | Ts1a1a    | Sid4       | Am1a        |
| Nk1a2       | Hf4       | Hf4    | Nk1       | Lm1a2b    | Lm1a2      | Gm1a210     |
| Nk1a3       | Hf4       | Hf4    | Am1a2     | Rm1a2     | Rm1a2      | Gm1a210     |
| Nk1a4       | Hf4       | Hf4    | Am1a2     | Rm1a2     | Rm1a2      | Gm1a210     |
| Nk1a5       | Hf4       | Hf4    | Am1a2     | Rm1a2     | Rm1a2      | Gm1a210     |
| Nk1a6       | Hf4       | Hf4    | Am1a2     | Rm1a2     | Rm1a2      | Gm1a210     |
| Nk1a7       | Hf4       | Hf4    | Am1a2     | Rm1a2     | Rm1a2      | Gm1a210     |
| Nk1a8       | Hf4       | Hf4    | Am1a2     | Rm1a2     | Rm1a2      | Gm1a210     |
| Nk1a9       | Hf4       | Hf4    | Am1a2     | Rm1a2     | Rm1a2      | Gm1a210     |
| Nk1a10      | Hf4       | Hf4    | Am1a2     | Rm1a2     | Rm1a2      | Gm1a210     |
| Nk1a11      | Hf4       | Hf4    | Am1a2     | Rm1a2     | Rm1a2      | Gm1a210     |
| Nk1a12      | Hf4       | Hf4    | Am1a2     | Rm1a2     | Rm1a2      | Gm1a210     |
| Nk1a13      | Hf4       | Hf4    | Am1a2     | Rm1a2     | Rm1a2      | Gm1a210     |
| Nk1a14      | Hf4       | Hf4    | Am1a2     | Rm1a2     | Rm1a2      | Gm1a210     |
| Nk1a15      | Hf4       | Hf4    | Am1a2     | Rm1a2     | Rm1a2      | Gm1a210     |
| Nk1a16      | Hf4       | Hf4    | Am1a2     | Rm1a2     | Rm1a2      | Gm1a210     |
| Nk1a17      | Hf4       | Hf4    | Am1a2     | Rm1a2     | Rm1a2      | Gm1a210     |
| Nk1a18      | Hf4       | Hf4    | Am1a2     | Rm1a2     | Rm1a2      | Gm1a210     |
| Nk1a19      | Hf4       | Hf4    | Am1a2     | Rm1a2     | Rm1a2      | Gm1a210     |
| Nk1a20      | Hf4       | Hf4    | Am1a2     | Rm1a2     | Rm1a2      | Gm1a210     |
| Nk1a21      | Hf4       | Hf4    | Am1a2     | Rm1a2     | Rm1a2      | Gm1a210     |
| Nk1a22      | Hf4       | Hf4    | Am1a2     | Rm1a2     | Rm1a2      | Gm1a210     |
| Nk1a23      | Hf4       | Hf4    | Am1a2     | Rm1a2     | Rm1a2      | Gm1a210     |
| Nk1a24      | Hf4       | Hf4    | Am1a2     | Rm1a2     | Rm1a2      | Gm1a210     |
| Nk1a25      | Hf4       | Hf4    | Am1a2     | Rm1a2     | Rm1a2      | Gm1a210     |
| Nk1a26      | Hf4       | Hf4    | Am1a2     | Rm1a2     | Rm1a2      | Gm1a210     |
| Nk1a27      | Hf4       | Hf4    | Am1a2     | Rm1a2     | Rm1a2      | Gm1a210     |
| Nk1a28      | Hf4       | Hf4    | Am1a2     | Rm1a2     | Rm1a2      | Gm1a210     |
| Nk1a29      | Hf4       | Hf4    | Am1a2     | Rm1a2     | Rm1a2      | Gm1a210     |
| Nk1a30      | Hf4       | Hf4    | Am1a2     | Rm1a2     | Rm1a2      | Gm1a210     |
| Nk1a31      | Hf4       | Hf4    | Am1a2     | Rm1a2     | Rm1a2      | Gm1a210     |
| Nk1a32      | Hf4       | Hf4    | Am1a2     | Rm1a2     | Rm1a2      | Gm1a210     |
| Nk1a33      | Hf4       | Hf4    | Am1a2     | Rm1a2     | Rm1a2      | Gm1a210     |
| Nk1a34      | Hf4       | Hf4    | Am1a2     | Rm1a2     | Rm1a2      | Gm1a210     |
| Nk1a35      | Hf4       | Hf4    | Am1a2     | Rm1a2     | Rm1a2      | Gm1a210     |
| Nk1a36      | Hf4       | Hf4    | Am1a2     | Rm1a2     | Rm1a2      | Gm1a210     |
| Nk1a37      | Hf4       | Hf4    | Am1a2     | Rm1a2     | Rm1a2      | Gm1a210     |
| Nk1a38      | Hf4       | Hf4    | Am1a2     | Rm1a2     | Rm1a2      | Gm1a210     |
| Nk1a39      | Hf4       | Hf4    | Am1a2     | Rm1a2     | Rm1a2      | Gm1a210     |
| Nk1a40      | Hf4       | Hf4    | Am1a2     | Rm1a2     | Rm1a2      | Gm1a210     |
| Nk1a41      | Hf4       | Hf4    | Am1a2     | Rm1a2     | Rm1a2      | Gm1a210     |
| Nk1a42      | Hf4       | Hf4    | Am1a2     | Rm1a2     | Rm1a2      | Gm1a210     |
| Nk1a43      | Hf4       | Hf4    | Am1a2     | Rm1a2     | Rm1a2      | Gm1a210     |
| Nk1a44      | Hf4       | Hf4    | Am1a2     | Rm1a2     | Rm1a2      | Gm1a210     |
| Nk1a45      | Hf4       | Hf4    | Am1a2     | Rm1a2     | Rm1a2      | Gm1a210     |
| Nk1a46      | Hf4       | Hf4    | Am1a2     | Rm1a2     | Rm1a2      | Gm1a210     |
| Nk1a47      | Hf4       | Hf4    | Am1a2     | Rm1a2     | Rm1a2      | Gm1a210     |
| Nk1a48      | Hf4       | Hf4    | Am1a2     | Rm1a2     | Rm1a2      | Gm1a210     |
| Nk1a49      | Hf4       | Hf4    | Am1a2     | Rm1a2     | Rm1a2      | Gm1a210     |
| Nk1a50      | Hf4       | Hf4    | Am1a2     | Rm1a2     | Rm1a2      | Gm1a210     |
| Nk1a51      | Hf4       | Hf4    | Am1a2     | Rm1a2     | Rm1a2      | Gm1a210     |
| Nk1a52      | Hf4       | Hf4    | Am1a2     | Rm1a2     | Rm1a2      | Gm1a210     |
| Nk1a53      | Hf4       | Hf4    | Am1a2     | Rm1a2     | Rm1a2      | Gm1a210     |
| Nk1a54      | Hf4       | Hf4    | Am1a2     | Rm1a2     | Rm1a2      | Gm1a210     |
| Nk1a55      | Hf4       | Hf4    | Am1a2     | Rm1a2     | Rm1a2      | Gm1a210     |
| Nk1a56      | Hf4       | Hf4    | Am1a2     | Rm1a2     | Rm1a2      | Gm1a210     |
| Nk1a57      | Hf4       | Hf4    | Am1a2     | Rm1a2     | Rm1a2      | Gm1a210     |
| Nk1a58      | Hf4       | Hf4    | Am1a2     | Rm1a2     | Rm1a2      | Gm1a210     |
| Nk1a59      | Hf4       | Hf4    | Am1a2     | Rm1a2     | Rm1a2      | Gm1a210     |
| Nk1a60      | Hf4       | Hf4    | Am1a2     | Rm1a2     | Rm1a2      | Gm1a210     |
| Nk1a61      | Hf4       | Hf4    | Am1a2     | Rm1a2     | Rm1a2      | Gm1a210     |
| Nk1a62      | Hf4       | Hf4    | Am1a2     | Rm1a2     | Rm1a2      | Gm1a210     |
| Nk1a63      | Hf4       | Hf4    | Am1a2     | Rm1a2     | Rm1a2      | Gm1a210     |
| Nk1a64      | Hf4       | Hf4    | Am1a2     | Rm1a2     | Rm1a2      | Gm1a210     |
| Nk1a65      | Hf4       | Hf4    | Am1a2     | Rm1a2     | Rm1a2      | Gm1a210     |
| Nk1a66      | Hf4       | Hf4    | Am1a2     | Rm1a2     | Rm1a2      | Gm1a210     |
| Nk1a67      | Hf4       | Hf4    | Am1a2     | Rm1a2     | Rm1a2      | Gm1a210     |
| Nk1a68      | Hf4       | Hf4    | Am1a2     | Rm1a2     | Rm1a2      | Gm1a210     |
| Nk1a69      | Hf4       | Hf4    | Am1a2     | Rm1a2     | Rm1a2      | Gm1a210     |
| Nk1a70      | Hf4       | Hf4    | Am1a2     | Rm1a2     | Rm1a2      | Gm1a210     |
| Nk1a71      | Hf4       | Hf4    | Am1a2     | Rm1a2     | Rm1a2      | Gm1a210     |
| Nk1a72      | Hf4       | Hf4    | Am1a2     | Rm1a2     | Rm1a2      | Gm1a210     |
| Nk1a73      | Hf4       | Hf4    | Am1a2     | Rm1a2     | Rm1a2      | Gm1a210     |
| Nk1a74      | Hf4       | Hf4    | Am1a2     | Rm1a2     | Rm1a2      | Gm1a210     |
| Nk1a75      | Hf4       | Hf4    | Am1a2     | Rm1a2     | Rm1a2      | Gm1a210     |
| Nk1a76      | Hf4       | Hf4    | Am1a2     | Rm1a2     | Rm1a2      | Gm1a210     |
| Nk1a77      | Hf4       | Hf4    | Am1a2     | Rm1a2     | Rm1a2      | Gm1a210     |
| Nk1a78      | Hf4       | Hf4    | Am1a2     | Rm1a2     | Rm1a2      | Gm1a210     |
| Nk1a79      | Hf4       | Hf4    | Am1a2     | Rm1a2     | Rm1a2      | Gm1a210     |
| Nk1a80      | Hf4       | Hf4    | Am1a2     | Rm1a2     | Rm1a2      | Gm1a210     |
| Nk1a81      | Hf4       | Hf4    | Am1a2     | Rm1a2     | Rm1a2      |             |

|               |               |               |               |
|---------------|---------------|---------------|---------------|
| Sdp           | Pcb7          | Epb413        | Pf66          |
| Aq11          | Eloc          | Agn           | SC3008609A    |
| H301          | Cst           | Nkx2          | Tand17        |
| Pv12          | Maz3          | Cd44          | Scf           |
| Pgfr3         | Lims2         | Nr41          | Rip2          |
| E1002024      | Wimaf2        | Cbl1          | Solend        |
| Nr1           | Efka          | Msc1          | Rip3          |
| Ggat          | Tmem100       | Pg2           | Rip2b         |
| Ahd5          | Pcb4          | Klf5          | Snc5          |
| Som1a         | Lamc2         | S100a4        | Rga4          |
| Nwa1          | Nes           | Scl38a4       | Cntf          |
| Pwmb          | Rmp2          | Rucl1         | Rarf1         |
| Axw1          | Muc11         | Cck1b1        | Emt           |
| Erg4a         | Adam33        | Lrn           | Hnf1          |
| Hs1272b       | Rarb3         | Uhr4          | S100p1        |
| Afx1a         | Nr45          | Tmaf2         | Smm101        |
| Cybb          | Tes           | Foxp1         | Yap           |
| Slim          | Sema3c        | G65           | Efr1          |
| Snanol1       | Hgp11         | Slc7a4        | Ta12ap3       |
| Zfp92         | Zfp93         | Rum2          | Gm486         |
| Pg2           | Foxd6         | Tmem200       | Pfb           |
| Cct1          | Pax1          | Adspg2        | Raf1          |
| mt-Nb5        | Adam22        | Abraac1       | Rin2          |
| Rnao2c        | Lrc1          | Pex1          | Hnf1b1        |
| Dyn11         | Hfoa1         | Tba4          | Gm1550        |
| Pgr1          | Tp53          | C13orf102     | Pf1c          |
| Mp19          | Ctcf          | Fgf11         | Rip1          |
| Mp42          | Atad2         | Ccl1          | Rip1          |
| Ct11          | Ahd2          | Plcb1         | Rip1          |
| Dd            | Cck8c         | Ank           | Smp           |
| Cdk2a1        | Fox           | Rarb2         | Ra102-p2      |
| Sfp7          | Slc38a4       | Gf14          | Rip7          |
| Pnc1          | Hmbr          | Tead          | Ahd5          |
| 603043C18Pfm1 | Nes           | Nes           | Ru1           |
| Apw18         | Slam          | Sart1         | Efr1          |
| Pg1           | Dsp1          | Emt2          | Rip1          |
| Gm17018       | Cck8a         | Cck8a         | Gm17018       |
| Np20          | Zfp385a       | Cck8b         | Cck3          |
| Erg2          | Dock11        | Hmfr          | Pg10b         |
| Pknox1        | Erg2          | Cmya5         | Cmya5         |
| Hg1           | Hns           | Cck8b         | Cck8b         |
| Gm3861        | Foxp1         | Foxp1         | Foxp1         |
| Bud           | Ube2b         | Cxcl5         | Cxcl5         |
| Cas9          | Dsp3          | Pax7          | Pax7          |
| mt-C2         | Cdkp12        | Rp25-p1       | Rp25-p1       |
| Tst1          | Fgf1          | Foxp1         | Foxp1         |
| Lamc2         | Msc1          | Sema3f        | Sema3f        |
| Cdk2          | Ckap4         | Camk4         | Camk4         |
| Cntc2         | Hdg1          | Ctgef         | Ctgef         |
| Gf13d         | Pg11          | Ahrb8b        | Ahrb8b        |
| Fhl12         | Tp53          | Ptfn          | Ptfn          |
| Gm26177       | Mx3           | Pv12          | Pv12          |
| S100a13       | Cbl12         | Pgaf          | Pgaf          |
| Dwr           | Hra3          | Rgagf6        | Rgagf6        |
| Hsck          | Mx3           | Ctcf          | Ctcf          |
| Tfap6         | Snh1          | Hra3          | Hra3          |
| Mp1           | Ctcf          | Cg3b          | Cg3b          |
| mt-Nb3        | Tp53          | Egfr4         | Egfr4         |
| Gm2216        | Pg11          | Pv1           | S-Dep         |
| Lnc17         | Pf14          | Pf14          | Pf14          |
| Pax10         | Linc86        | #205          | #205          |
| Cxcl4         | Gli           | Mbp           | Mbp           |
| mt-Nb1        | Fox1          | Lum           | Lum           |
| Wp151         | Cck8c         | Tnfr3         | Tnfr3         |
| Gm1341        | Lgfr          | P16           | P16           |
| Mf1a          | Cck8b3        | Cp1           | Cp1           |
| Rp23-p1       | Zfp579        | Ling1         | Ling1         |
| mt-C2         | Fmo2          | S100          | S100          |
| Tm7           | Erg4a         | Cxcl2         | Cxcl2         |
| Mg13          | Cxcl2         | H2-C1         | H2-C1         |
| Gm3817        | Lung1         | #207          | #207          |
| Nb1a          | Pax3a         | Pg4a3         | Pg4a3         |
| Gm1025        | Pg17          | Tma4a         | Tma4a         |
| Mg1           | Pknox1        | Gm2181        | Gm2181        |
| Dm3           | Hnf1          | Hnf1          | Hnf1          |
| mt-Nb2        | Fox1          | Sun12         | Sun12         |
| Mf1c          | S100a13       | Pv1a          | Pv1a          |
| Mf1c          | Muc1          | Muc1          | Muc1          |
| Pkb1b         | Sirt6         | Vamp8         | Vamp8         |
| mt-Nb4        | Muc1          | Bmp2          | Bmp2          |
| mt-Cy6        | Muc1          | Lims2         | Lims2         |
| Rm2b          | Rf1           | Rp23-p1       | Rp23-p1       |
| Cmp1          | Mg19          | Pv1b          | Pv1b          |
| Tmem34        | Smp           | Rp23          | Rp23          |
| Gm2649        | Pg12a         | Gm732         | Gm732         |
| Bu1           | Emt2          | Z100002000A   | Z100002000A   |
| Ubc2          | Pf1b          | Ecm1          | Ecm1          |
| Nb1a1         | Fam64a        | S101          | S101          |
| Tst1          | Z10000421     | Lam15         | Lam15         |
| Efr1          | Cg1           | Cg1           | Cg1           |
| Pkb1a         | Scl1a1        | Scl1a1        | Scl1a1        |
| Hk1           | Nwa4          | Nwa4          | Nwa4          |
| Hm3           | Ahrb1a3       | Ahrb1a3       | Ahrb1a3       |
| Cck8c         | Dkr3b         | Dkr3b         | Dkr3b         |
| Al3a1         | Pg11          | Pg11          | Pg11          |
| Foxp2         | Fam4a         | Fam4a         | Fam4a         |
| Mf1b          | Tmem31        | Tmem31        | Tmem31        |
| Dsp1          | Rp18-p1       | Rp18-p1       | Rp18-p1       |
| Sox2          | Mu11          | Mu11          | Mu11          |
| Mf1b          | Ahrb1a1       | Ahrb1a1       | Ahrb1a1       |
| Gm7894        | Cg1           | Cg1           | Cg1           |
| Erg6          | Mg23-p1       | Mg23-p1       | Mg23-p1       |
| Sap10         | 603043C18Pfm1 | 603043C18Pfm1 | 603043C18Pfm1 |
| Gm4311        | 493043C18Pfm1 | 493043C18Pfm1 | 493043C18Pfm1 |
| Pg1a3         | Lymc2         | Lymc2         | Lymc2         |
| Muc4          | Ck1b2         | Ck1b2         | Ck1b2         |
| Cant1         | Pv1b1         | Pv1b1         | Pv1b1         |
| Gp1           | Adam10        | Adam10        | Adam10        |
| Sfp1          | Mg1           | Mg1           | Mg1           |
| Zfp427        | Lamc2         | Lamc2         | Lamc2         |
| Tm            | Gat           | Gat           | Gat           |
| Dsp1          | Efr1          | Efr1          | Efr1          |
| Nr1           | Af1           | Af1           | Af1           |
| 170001903     | Gm41          | Gm41          | Gm41          |
| Pkb1b         | Nf1           | Nf1           | Nf1           |
| Lrf1a1        | Npaf3         | Npaf3         | Npaf3         |
| Scl2a2        | Dkr3c         | Dkr3c         | Dkr3c         |
| Pf1a1         | Viv           | Viv           | Viv           |
| Scl2a7        | Mg1           | Mg1           | Mg1           |
| Kank1         | Pg2           | Pg2           | Pg2           |
| Six3b         | Rch1          | Rch1          | Rch1          |
| Muc1          | Pv1a1         | Pv1a1         | Pv1a1         |
| Tmem33        | Af4a          | Af4a          | Af4a          |
| KC10021       | Fib           | Fib           | Fib           |
| Hnf1          | Ube2m         | Ube2m         | Ube2m         |
| Mafk1a        | Hf1           | Hf1           | Hf1           |
| Adg12         | Pg1f          | Pg1f          | Pg1f          |
| S100a2        | Hnf12         | Hnf12         | Hnf12         |
| Mg12          | Pg1           | Pg1           | Pg1           |
| Fox1          | Mg149         | Mg149         | Mg149         |
| Muc1          | Mg1           | Mg1           | Mg1           |
| Cxcl1         | Smm1          | Smm1          | Smm1          |
| Af1           | Smp2          | Smp2          | Smp2          |
| Raf1d         | Lims4b        | Lims4b        | Lims4b        |
| Larg1         | Pg154b        | Pg154b        | Pg154b        |
| Fib           | Cck8c         | Cck8c         | Cck8c         |
| Mf12          | Cck1          | Cck1          | Cck1          |
| Df1           | Pg1b3         | Pg1b3         | Pg1b3         |
| Efr1          | Nb1           | Nb1           | Nb1           |
| Usp3          | Nf1           | Nf1           | Nf1           |
| Efr1          | Cck8c3        | Cck8c3        | Cck8c3        |
| Klf3          | Mg1a2         | Mg1a2         | Mg1a2         |
| Nf1c          | Dm5           | Dm5           | Dm5           |
| Mf1c          | Dm            | Dm            | Dm            |
| S100a9        | Gm152b        | Gm152b        | Gm152b        |
| Tg12          | Dm5d          | Dm5d          | Dm5d          |
| Pf1a3         | Efr1          | Efr1          | Efr1          |
| Ahrb1a        | Smp5          | Smp5          | Smp5          |
| Cg1f1         | Hf1           | Hf1           | Hf1           |
| Pf1c          | Hf1           | Hf1           | Hf1           |
| Cxcl1         | Fg1           | Fg1           | Fg1           |
| Efr1a         | Mf1a2         | Mf1a2         | Mf1a2         |
| Tp2           | Gm141         | Gm141         | Gm141         |
| Ube2m         | Gm142         | Gm142         | Gm142         |
| Pkb1b         | Mf1a3         | Mf1a3         | Mf1a3         |
| Cg1f1         | Gm1224        | Gm1224        | Gm1224        |
| Mf1c1         | Gm1216        | Gm1216        | Gm1216        |
| Atx1          | Pv100         | Pv100         | Pv100         |
| Mf1c1         | Mf1a          | Mf1a          | Mf1a          |
| Fib           | Usp2          | Usp2          | Usp2          |
| Vg15          | Mf1a1         | Mf1a1         | Mf1a1         |
| Nas50         | Tg1           | Tg1           | Tg1           |
| Vom1          | Bcl2          | Bcl2          | Bcl2          |
| Cm1           | Hs1b7         | Hs1b7         | Hs1b7         |
| mt-Nb6        | Tm3p          | Tm3p          | Tm3p          |
| Pan           | Pg1           | Pg1           | Pg1           |
| Suff1         | Rp11          | Rp11          | Rp11          |
| Pf1a1         | Mf1b1         | Mf1b1         | Mf1b1         |
| Tg1f3         | Cm10          | Cm10          | Cm10          |
| Rp1a          | Pg1c          | Pg1c          | Pg1c          |
| hr            | Efr1b         | Efr1b         | Efr1b         |
| Rf1c1         | Rp10-p1       | Rp10-p1       | Rp10-p1       |
| Gm9385        | Ra1           | Ra1           | Ra1           |
| Lap           | Mf1           | Mf1           | Mf1           |
| Lp1           | Gf1a          | Gf1a          | Gf1a          |
| Af12          | Gm102b        | Gm102b        | Gm102b        |
| Hf1           | Rp10a-p2      | Rp10a-p2      | Rp10a-p2      |
| Fam13a        | Cg1           | Cg1           | Cg1           |
| Mg1b          | Tc12p1        | Tc12p1        | Tc12p1        |
| Lg1           | Gm1342b       | Gm1342b       | Gm1342b       |
| Lg1           | Nf1           | Nf1           | Nf1           |
| Usp11         | 1810071176a   | 1810071176a   | 1810071176a   |
| Hs1b7         | 0610001481a   | 0610001481a   | 0610001481a   |
| Hs1b7         | Hs1b7         | Hs1b7         | Hs1b7         |
| Emt2          | Emt2          | Emt2          | Emt2          |
| Rp2b          | Rp2b          | Rp2b          | Rp2b          |
| Gm1-p2        | Gm1-p2        | Gm1-p2        | Gm1-p2        |
| Cck8c         | Cck8c         | Cck8c         | Cck8c         |
| Gm1a3         | Gm1a3         | Gm1a3         | Gm1a3         |
| Smm1a3        | Smm1a3        | Smm1a3        | Smm1a3        |
| Ahrb1a        | Ahrb1a        | Ahrb1a        | Ahrb1a        |
| Mf1           | Mf1           | Mf1           | Mf1           |
| Nf1           | Nf1           | Nf1           | Nf1           |
| Cxcl3         | Cxcl3         | Cxcl3         | Cxcl3         |
| Hs1b7a        | Hs1b7a        | Hs1b7a        | Hs1b7a        |
| Mf1a1         | Mf1a1         | Mf1a1         | Mf1a1         |
| Ba1           | Ba1           | Ba1           | Ba1           |
| mt-Nb7        | mt-Nb7        | mt-Nb7        | mt-Nb7        |
